# Supplementary material
Source: Springer Nature journal article supplement (https://www.springermedizin.de/resource/supplementary/12955_2007_415_MOESM1_ESM.pdf/9560380)

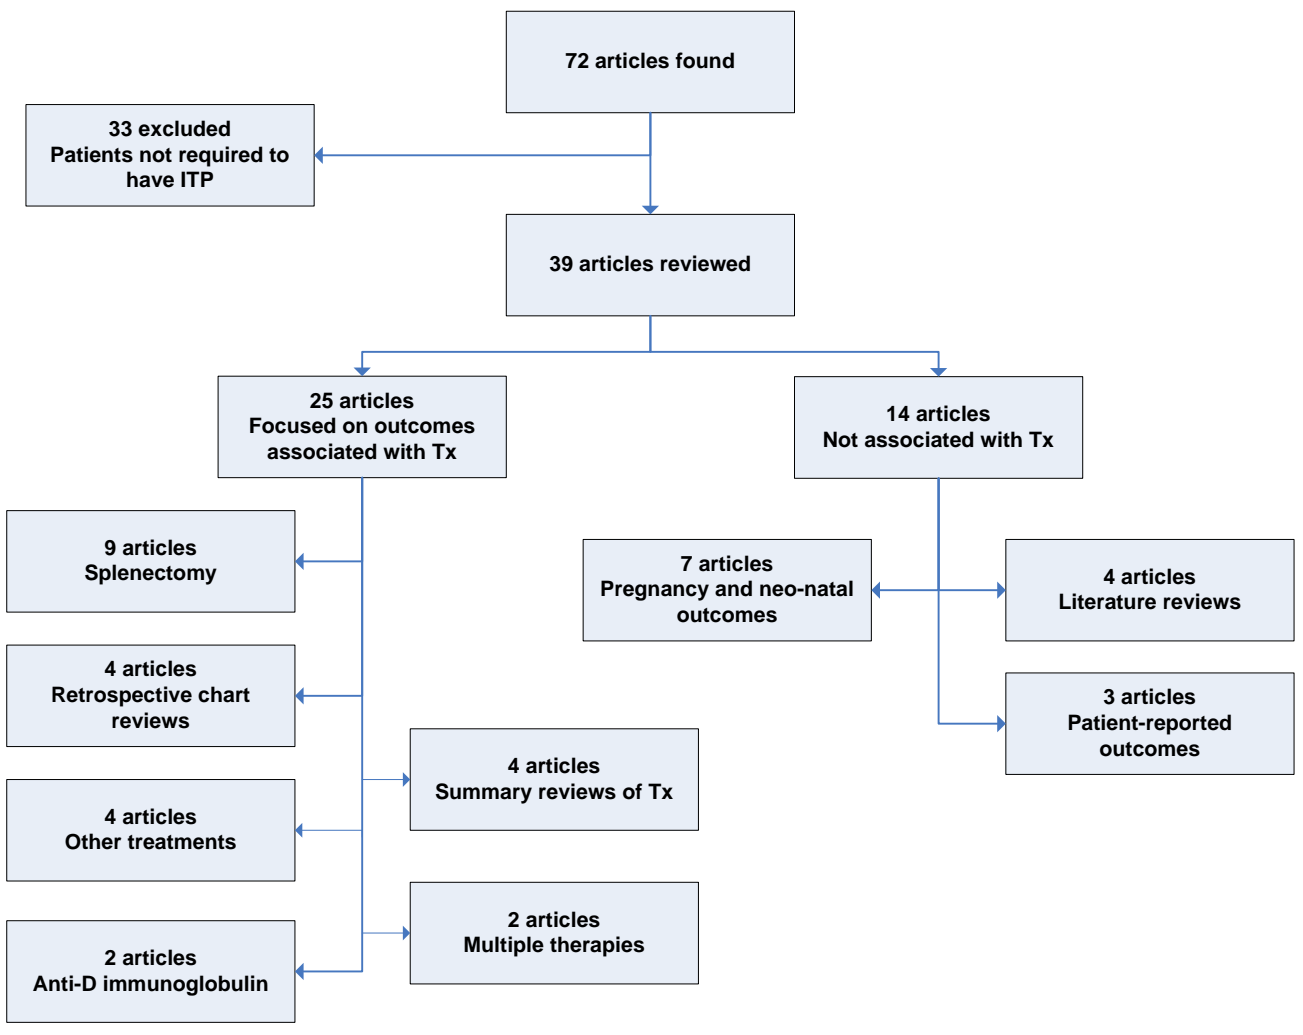

Supplement: MOESM1 [file 9560380]
